# Supplementary material for: Investigating the physiological response of Pichia (Komagataella) pastoris GS115 to the heterologous expression of misfolded proteins using chemostat cultures
Source: PubMed Central journal article supplement — Appl Microbiol Biotechnol. 2013 Sep 11;97(22):9747–62. doi: 10.1007/s00253-013-5186-1 (PMC3825213; doi:10.1007/s00253-013-5186-1), 2013-09-11
Supplement: 253_2013_5186_MOESM35_ESM.pdf [file 253_2013_5186_MOESM35_ESM.pdf]

**Applied Microbiology and Biotechnology**

**Investigating the physiological response of *Pichia (Komagataella) pastoris* GS115 to the heterologous expression of misfolded proteins using chemostat cultures.**

**Andy Hesketh<sup>1#</sup>, Juan I. Castrillo<sup>1#</sup>, Trevor Sawyer<sup>1</sup>, David B. Archer<sup>2</sup>  
and Stephen G. Oliver<sup>1\*</sup>**

<sup>1</sup> **Cambridge Systems Biology Centre and Department of Biochemistry. University of Cambridge, Sanger Building, 80 Tennis Court Road, Cambridge CB2 1GA, UK.**

<sup>2</sup> **School of Biology, University of Nottingham, University Park, Nottingham, NG7 2RD, UK.**

**\*Corresponding author sgo24@cam.ac.uk**

**#Contributed equally to this work.**

**Supplementary Table S1. Composition of Non-inducible (sorbitol) and Inducible (sorbitol and methanol) carbon (C) limited media.**

Media composition based on (Baganz et al. 1997; Castrillo et al. 2007; Jungo et al. 2007).

|                                                 | <b>Sorbitol (C) limited medium</b>                     | <b>Sorbitol+methanol (C) limited medium</b>              |
|-------------------------------------------------|--------------------------------------------------------|----------------------------------------------------------|
| Sorbitol                                        | 20 g l <sup>-1</sup> (0.652 g. at. C l <sup>-1</sup> ) | 11.3 g l <sup>-1</sup> (0.372 g. at. C l <sup>-1</sup> ) |
| Methanol                                        | --                                                     | 9.0 g l <sup>-1</sup> (0.280 g. at. C l <sup>-1</sup> )  |
| (NH <sub>4</sub> ) <sub>2</sub> SO <sub>4</sub> |                                                        | 3.13 g l <sup>-1</sup>                                   |
| KH <sub>2</sub> PO <sub>4</sub>                 |                                                        | 2.0 g l <sup>-1</sup>                                    |
| MgSO <sub>4</sub> · 7H <sub>2</sub> O           |                                                        | 0.55 g l <sup>-1</sup>                                   |
| NaCl                                            |                                                        | 0.10 g l <sup>-1</sup>                                   |
| CaCl <sub>2</sub> · 2H <sub>2</sub> O           |                                                        | 0.09 g l <sup>-1</sup>                                   |
| Histidine                                       |                                                        | 0.03 g l <sup>-1</sup>                                   |
| Uracil                                          |                                                        | 0.02 g l <sup>-1</sup>                                   |
| ZnSO <sub>4</sub> · 7H <sub>2</sub> O           |                                                        | 0.07 mg l <sup>-1</sup>                                  |
| FeCl <sub>3</sub> · 6H <sub>2</sub> O           |                                                        | 0.05 mg l <sup>-1</sup>                                  |
| CuSO <sub>4</sub> · 5H <sub>2</sub> O           |                                                        | 0.01 mg l <sup>-1</sup>                                  |
| H <sub>3</sub> BO <sub>3</sub>                  |                                                        | 0.01 mg l <sup>-1</sup>                                  |
| KI                                              |                                                        | 0.01 mg l <sup>-1</sup>                                  |
| Inositol                                        |                                                        | 62 mg l <sup>-1</sup>                                    |
| Thiamine/HCl                                    |                                                        | 14 mg l <sup>-1</sup>                                    |
| Pyridoxine                                      |                                                        | 4 mg l <sup>-1</sup>                                     |
| Ca-pantothenate                                 |                                                        | 4 mg l <sup>-1</sup>                                     |
| Biotin                                          |                                                        | 0.3 mg l <sup>-1</sup>                                   |
| pH                                              |                                                        | 5.0                                                      |

## References

- Baganz F, Hayes A, Marren D, Gardner DC, Oliver SG. (1997) Suitability of replacement markers for functional analysis studies in *Saccharomyces cerevisiae*. *Yeast* 13, 1563-1573. PubMed PMID: 9509575.
- Castrillo JI, Zeef LA, Hoyle DC, Zhang N, Hayes A, Gardner DC, Cornell MJ, Petty J, Hakes L, Wardleworth L, Rash B, Brown M, Dunn WB, Broadhurst D, O'Donoghue K, Hester SS, Dunkley TP, Hart SR, Swainston N, Li P, Gaskell SJ, Paton NW, Lilley KS, Kell DB, Oliver SG. (2007) Growth control of the eukaryote cell: a systems biology study in yeast. *J Biol.* 6:4. PubMed PMID: 17439666.
- Jungo C, Marison I, von Stockar U. (2007) Regulation of alcohol oxidase of a recombinant *Pichia pastoris* Mut+ strain in transient continuous cultures. *J Biotechnol.* 130, 236-246. PubMed PMID: 17566583.
